# Supplementary material for: Cost-effectiveness of ‘immediate IVF’ versus ‘delayed IVF’: a prospective study
Source: Oxford University Press journal article supplement (doi:10.1093/humrep/dex018), 2017-01-30
Supplement: dex018suppl_table1.pdf [file dex018suppl_table1.pdf]

**Supplementary Table S1** Input parameters for the base-case analyses and the sensitivity analyses

| <b>Input variables</b>                          | <b>Expectant management</b>                 |                                                                                    | <b>IVF</b>                                  |                                          |
|-------------------------------------------------|---------------------------------------------|------------------------------------------------------------------------------------|---------------------------------------------|------------------------------------------|
| <b>Probabilities</b>                            | <b>Value</b>                                | <b>Source</b>                                                                      | <b>Value</b>                                | <b>Source</b>                            |
| Chances ongoing pregnancy within 12 months      | Prediction model                            | <a href="#">Eijkemans et al. (2008)</a>                                            | Prediction model                            | <a href="#">Lintsen et al. (2007)</a>    |
| Conversion ongoing pregnancy to live birth rate | 92%                                         | <a href="#">Arce et al. (2005)</a>                                                 | 92%                                         | <a href="#">Arce et al. (2005)</a>       |
| Chances of twin pregnancy                       | 1%                                          | Dutch registry 2012                                                                | 6,6%                                        | Dutch registry 2012                      |
| Discounting, per year                           | 3.5%                                        | NICE                                                                               | 3.5%                                        | NICE                                     |
| <b>Costs</b>                                    |                                             |                                                                                    |                                             |                                          |
| Treatment, per cycle                            | Zero                                        | No treatments                                                                      | Direct and indirect medical costs           | <a href="#">Bouwman et al. (2008b)</a> . |
| Treatment, per year                             | Zero                                        | No treatments                                                                      | Prediction model                            | <a href="#">Lintsen et al. (2007)</a>    |
| Pregnancy and delivery                          | Single: €2023                               | <a href="#">Lukassen et al. (2004)</a> ,<br><a href="#">Chambers et al. (2007)</a> | Single: €2549                               | <a href="#">Lukassen et al. (2004)</a>   |
|                                                 | Twin: €12 705                               |                                                                                    | Twin: €13 469                               |                                          |
| Updating over time                              | Price level of 2014                         | National price index for the Netherlands                                           | Price level of 2014                         | National price index for the Netherlands |
| <b>Sensitivity analyses</b>                     |                                             |                                                                                    |                                             |                                          |
| Discounting, per year                           | Costs: 4%, Effects: 1.5%                    | Dutch guideline                                                                    | Costs: 4%, Effects: 1.5%                    | Dutch guideline                          |
| Alternative costs pregnancy and delivery        | Singleton: €4098                            | <a href="#">Chambers et al. (2007)</a>                                             | Singleton: €4624                            | <a href="#">Chambers et al. (2007)</a>   |
|                                                 | Twin: €13 350                               |                                                                                    | Twin: €14 114                               |                                          |
| Twin pregnancy                                  | Counting as two successes (two live births) |                                                                                    | Counting as two successes (two live births) |                                          |
